# Supplementary material
Source: Royal Society of Chemistry journal article supplement (doi:10.1039/d6fo00049e)
Supplement: d6fo00049e1.pdf [file d6fo00049e1.pdf]

## Supporting Information

1 ***Limosilactobacillus fermentum* 50 Alleviates Vulvovaginal Candidiasis**  
2 **via the Gut-Vagina Axis: Modulating Microbiota, Barrier Function**  
3 **and Inflammation**

4 **Xiaoyue Bai<sup>a</sup>, Zhichao Chen<sup>a</sup>, Yizhi Jing<sup>b</sup>, Jiahui Liu<sup>a</sup>, Zheng Han<sup>a</sup>, Qingqiu Ye<sup>a</sup>,**  
5 **Yanling Hao<sup>b</sup>, and Zhengyuan Zhai<sup>a\*</sup>**

6 <sup>a</sup> College of Food Science and Nutritional Engineering, China Agricultural University,  
7 Beijing 100083, China

8 <sup>b</sup> Key Laboratory of Precision Nutrition and Food Quality, Department of Nutrition and  
9 Health, China Agricultural University, Beijing 100193, China

10 **\*Corresponding author:** zhaizy@cau.edu.cn

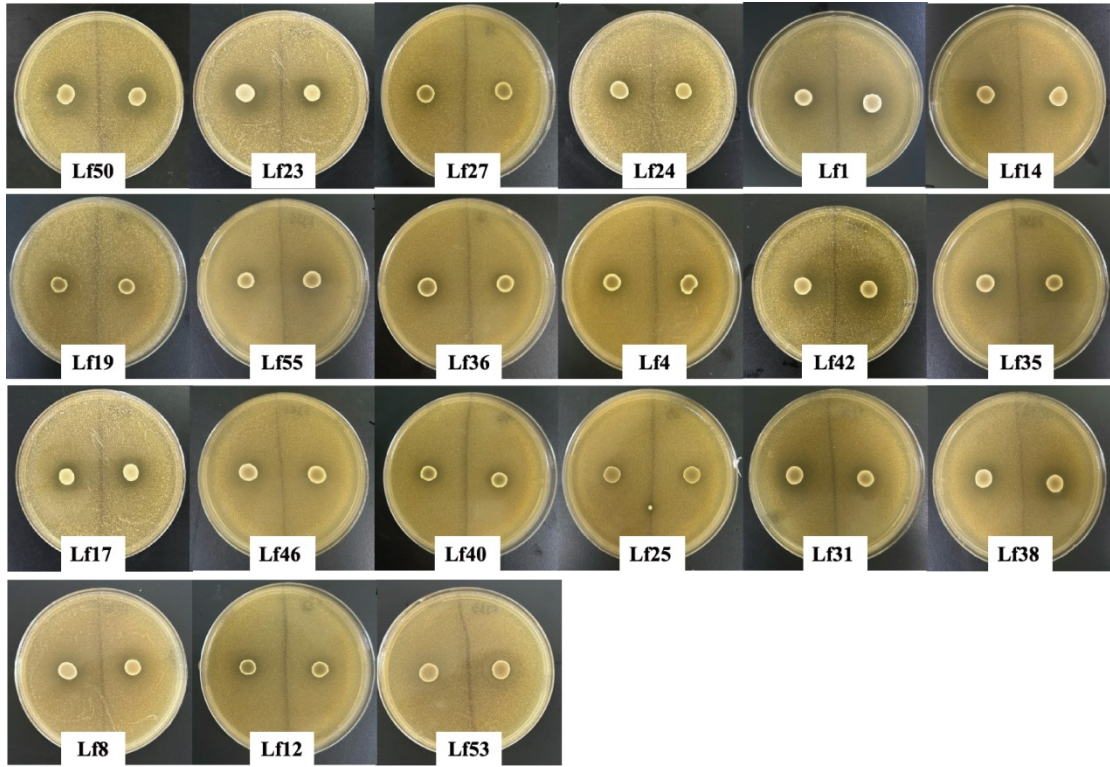

11

12 **Figure S1** Spot-on-Lawn plate showing anti-*C. albicans* activity of 21 *L. fermentum* strains.

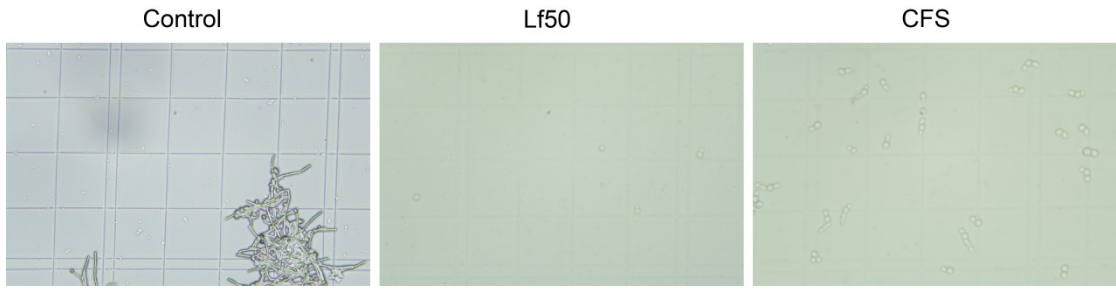

13

14 **Figure S2** Representative micrographs of the counted germ tubes.

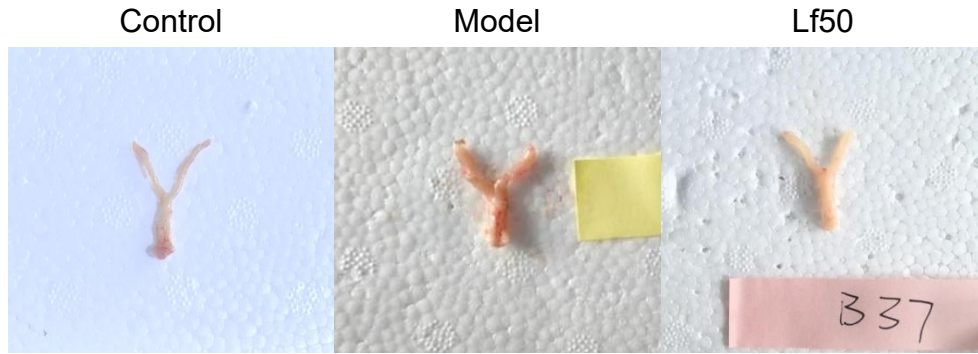

15

16 **Figure S3** Representative macroscopic images of the vagina and uterus.

17 **Table S1.** Bacteria strains used in this study.

| Strain name                             | Strain source                                                                  |
|-----------------------------------------|--------------------------------------------------------------------------------|
| <i>Limosilactobacillus fermentum</i> 1  | Cow milk                                                                       |
| <i>Limosilactobacillus fermentum</i> 4  | Cow milk                                                                       |
| <i>Limosilactobacillus fermentum</i> 8  | Buffalo Milk                                                                   |
| <i>Limosilactobacillus fermentum</i> 12 | Dali Zhuganzha, a traditional fermented pork product                           |
| <i>Limosilactobacillus fermentum</i> 14 | Dali Rubing, a traditional goat's milk cheese                                  |
| <i>Limosilactobacillus fermentum</i> 17 | Dali Zhuganzha, a traditional fermented pork product                           |
| <i>Limosilactobacillus fermentum</i> 19 | Dali Rushan, a traditional laminated and dried dairy product                   |
| <i>Limosilactobacillus fermentum</i> 23 | Cow milk                                                                       |
| <i>Limosilactobacillus fermentum</i> 24 | Cow milk                                                                       |
| <i>Limosilactobacillus fermentum</i> 25 | Cow milk                                                                       |
| <i>Limosilactobacillus fermentum</i> 27 | Dali Zhuganzha, a traditional fermented pork product                           |
| <i>Limosilactobacillus fermentum</i> 31 | Cow milk                                                                       |
| <i>Limosilactobacillus fermentum</i> 35 | Dali Doufuchang , a traditional fermented sausage                              |
| <i>Limosilactobacillus fermentum</i> 36 | Dali Mianfeizi , a traditional sourdough starter                               |
| <i>Limosilactobacillus fermentum</i> 38 | Dali Mianfeizi , a traditional sourdough starter                               |
| <i>Limosilactobacillus fermentum</i> 40 | Mao-tofu (a fungal-fermented soybean curd with characteristic mycelial growth) |
| <i>Limosilactobacillus fermentum</i> 42 | Dali Rushan, a traditional laminated and dried dairy product                   |
| <i>Limosilactobacillus fermentum</i> 46 | Dali Mianfeizi , a traditional sourdough starter                               |
| <i>Limosilactobacillus fermentum</i> 50 | Mao-tofu (a fungal-fermented soybean curd with characteristic mycelial growth) |
| <i>Limosilactobacillus fermentum</i> 53 | Fuyuan Suanluobo, a traditional fermented radish                               |
| <i>Limosilactobacillus fermentum</i> 55 | Cow milk                                                                       |

19 **Table S2.** Vaginal inflammation scoring criteria for vaginitis assessment.

| <b>Score</b> | <b>Erythema</b>                          | <b>Edema</b>                                            | <b>Discharge</b>                                                         |
|--------------|------------------------------------------|---------------------------------------------------------|--------------------------------------------------------------------------|
| 0            | None<br>No erythema                      | None<br>No edema                                        | None<br>No discharge                                                     |
| 1            | Very mild<br>Barely perceptible erythema | Very mild<br>Barely perceptible edema                   | Very scant<br>Trace amount of discharge                                  |
| 2            | Mild<br>Faint redness                    | Mild<br>Slight but noticeable edema                     | Scant<br>Small amount of discharge                                       |
| 3            | Moderate<br>Marked redness               | Moderate<br>Marked edema (~1 mm elevation)              | Moderate<br>Moderate amount of discharge                                 |
| 4            | Severe<br>Beet-red or purplish redness   | Severe<br>Marked edema (>1 mm elevation, extended area) | Severe<br>Profuse discharge (moistening a considerable perivaginal area) |

21 **Table S3.** Histopathological Scoring Criteria for Vaginitis Assessment.

| <b>Score</b> | <b>Inflammatory Cell Infiltration</b>                               | <b>Epithelial Integrity</b>                                                       |
|--------------|---------------------------------------------------------------------|-----------------------------------------------------------------------------------|
| <b>0</b>     | <b>None</b><br>No or occasional neutrophils                         | <b>Intact</b><br>Stratified squamous epithelium intact with clear layers          |
| <b>1</b>     | <b>Mild</b><br>Scattered neutrophils                                | <b>Mild desquamation</b><br>Superficial epithelial cells sloughed                 |
| <b>2</b>     | <b>Moderate</b><br>Dense inflammatory infiltrate                    | <b>Moderate erosion</b><br>Epithelial loss involving <50% of full thickness       |
| <b>3</b>     | <b>Severe</b><br>Diffuse infiltration with microabscess or necrosis | <b>Severe ulceration</b><br>Extensive epithelial loss with exposed lamina propria |

23 **Table S4.** RT-qPCR primer sequences for target genes.

| <b>Gene</b>                     | <b>Forward Primer (5'-3')</b>  | <b>Reverse Primer (5'-3')</b> |
|---------------------------------|--------------------------------|-------------------------------|
| <i>ALS3</i>                     | CTAATGCTGCTACGTATAATT          | CCTGAAATTGACATGTAGCA          |
| <i>HWP1</i>                     | TGGTGCTATTACTATTCCGG           | CAATAATAGCAGCACCGAAG          |
| <i>ECE1</i>                     | GCTGGTATCATTGCTGATAT           | TTCGATGGATTGTTGAACAC          |
| <i>TNF-<math>\alpha</math></i>  | CCTGTAGCCCACGTCGTAG            | GGGAGTAGACAAGGTACAACC<br>C    |
| <i>SI00a8</i>                   | TGTCCTCAGTTTGTGCAGAATATAA<br>A | TCACCATCGCAAGGAACTCC          |
| <i>SI00a9</i>                   | GGTGAAGCACAGTTGGCA             | GTGTCCAGGTCCTCCATGATG         |
| <i>IL-10</i>                    | GCTCTTACTGACTGGCATGAG          | CGCAGCTCTAGGAGCATGTG          |
| <i>ZO-1</i>                     | GGCCTTGGCCTAGCATAACAC          | GTCTTCATTTGACCCTCCCTC         |
| <i>Occludin</i>                 | TTGAAAGTCCACCTCCTTACAGA        | CCGATAAAAAGAGTACGCTG<br>G     |
| <i>Claudin-1</i>                | GGGGACAACATCGTGACCG            | AGGAGTCGAAGACTTTGCACT         |
| <i><math>\beta</math>-actin</i> | GTGACGTTGACATCCGTAAGA          | GCCGGACTCATCGTACTCC           |

24

25
